# Supplementary material for: Assessment and diagnostic relevance of novel serum biomarkers for early decision of ST-elevation myocardial infarction
Source: PubMed Central journal article supplement (PMC4536992; doi:10.18632/oncotarget.4001), 2015-05-18
Supplement: oncotarget-06-12970-s001.pdf [file oncotarget-06-12970-s001.pdf]

SUPPLEMENTARY FIGURES AND TABLES

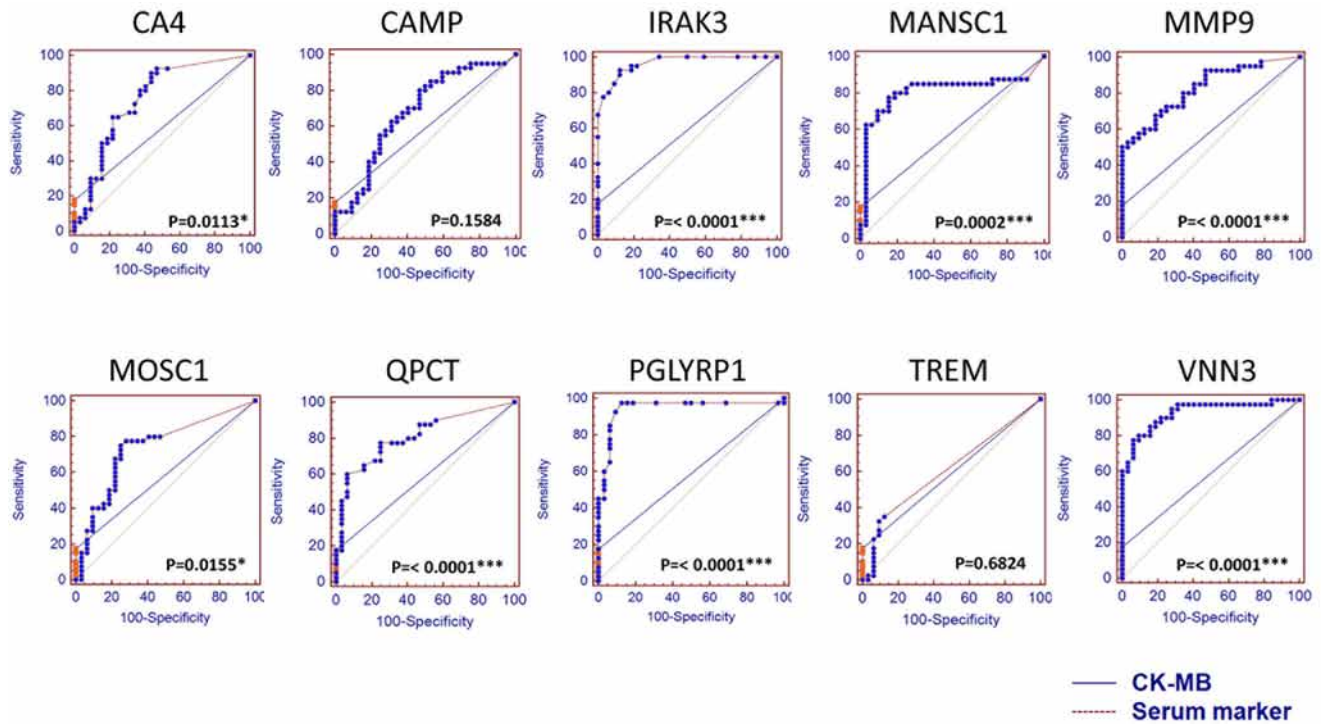

Supplementary Figure S1: The ROC curve analysis of the plasma proteins encoded by the 10 candidate genes and STEMI standard marker, CK-MB. Statistically significant difference of AUC compared with CK-MB (\*,  $P < 0.05$ ; \*\*,  $P < 0.01$ ; \*\*\*,  $P < 0.001$ ).

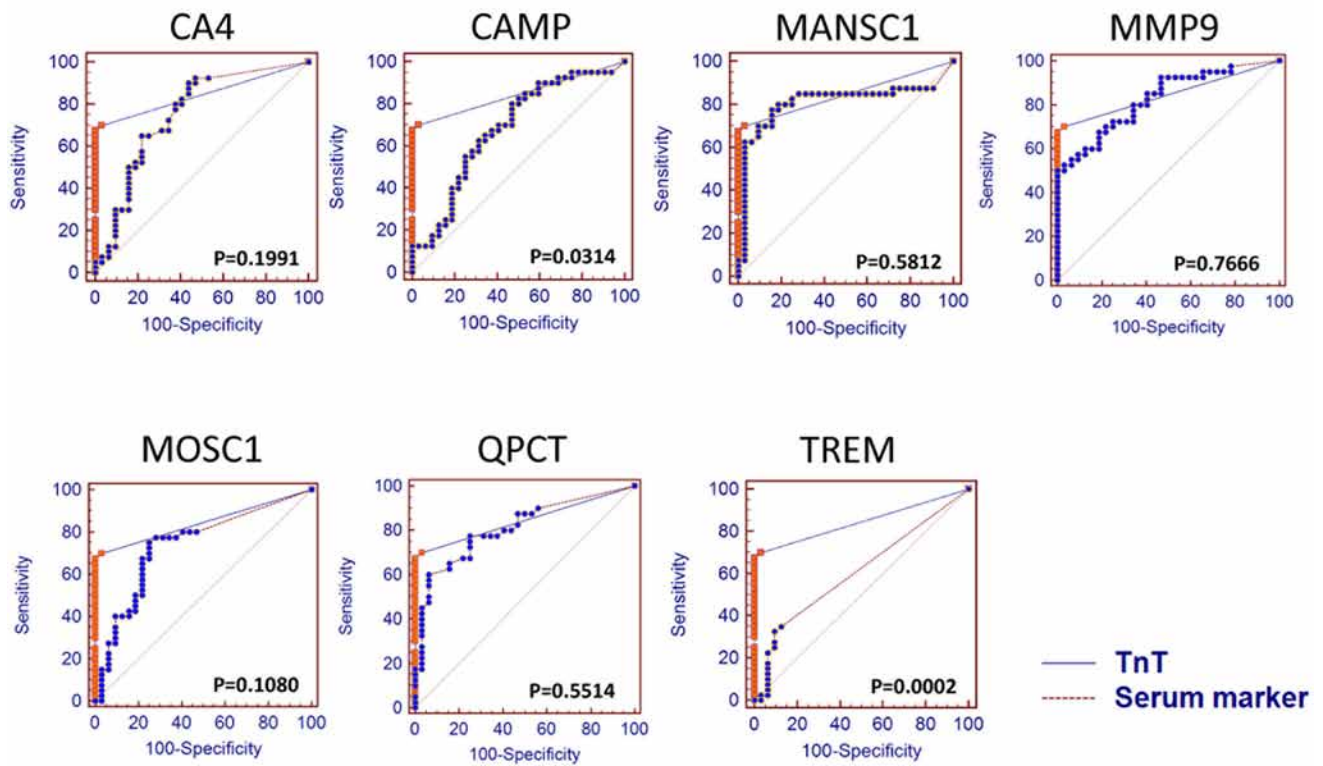

**Supplementary Figure S2: The ROC curve analysis of the plasma proteins encoded by other 7 candidate genes and STEMI standard marker, TnT.** Statistically significant difference of AUC compared with TnT. Although TREM and CAMP have statistically significant difference of AUC compared with TnT, we do not indicate them as markers since their AUC values are less than TnT.

**Supplementary Table S1. Primer sequences used for quantitative real-time polymerase chain reaction**

| Gene symbol            | GenBank Accession | Gene name                                                | Forward primer<br>5' → 3' | Reverse primer<br>5' → 3'     | Amplicon size (bp) |
|------------------------|-------------------|----------------------------------------------------------|---------------------------|-------------------------------|--------------------|
| IL2RB                  | NM_000878.2       | interleukin 2 receptor, beta                             | GAGACGTCC<br>AGAAGTGGCTC  | GTAACCCTGGT<br>TGGTGAAGC      | 200                |
| CX3CR1                 | NM_001337.3       | chemokine (C-X3-C motif) receptor 1                      | TGACTGGCAG<br>ATCCAGAGGTT | GTAGAATATGG<br>ACAGGAACAC     | 164                |
| CCL5                   | NM_002985.2       | chemokine (C-C motif) ligand 5                           | CGCTGTCATC<br>CTCATTGCTA  | GACAAAGACG<br>ACTGCTGGGT      | 172                |
| CXCR3                  | NM_001504.1       | chemokine (C-X-C motif) receptor 3, transcript variant A | ACCCAGCAG<br>CCAGAGCACC   | TCATAGGAAGA<br>GCTGAAGTTCTCCA | 111                |
| IL6R                   | NM_000565.2       | interleukin 6 receptor, transcript variant 1             | TGCCATTGTT<br>CTGAGGTTCA  | TCGAGGTATT<br>GTCAGACCCC      | 185                |
| IL17RA                 | NM_014339.4       | interleukin 17 receptor A                                | AATGAACGTT<br>TGTGCGTCAG  | CTCACAGTCA<br>GGCACAAGGA      | 195                |
| IL18RAP                | NM_003853.2       | interleukin 18 receptor accessory protein                | GATCAGACGC<br>TTGGGGATAA  | CCTGGAGCC<br>ACATCTCTTTC      | 185                |
| IL18R1                 | NM_003855.2       | interleukin 18 receptor 1                                | TGGAGGAGCT<br>GTTGTTGATG  | ATTGGGGCA<br>AGAATGTGAAG      | 200                |
| <b>Reference genes</b> |                   |                                                          |                           |                               |                    |
| GAPDH                  | NM_001256799.2    | glyceraldehyde-3-phosphate dehydrogenase                 | AATGGGCAGCC<br>GTTAGGAAA  | GCGCCCAAT<br>ACGACCAAATC      | 168                |

**Supplementary Table S2. 546 Differentially expressed genes in STEMI compared with non-STEMI group (Normal and r\_STEMI)**

**Supplementary Table S3. Differentially regulated gene transcripts (>2-fold) in STEMI compared with normal patients**

| GenBank ID                                  | Gene symbol | Descriptive name                                        | Fold change |
|---------------------------------------------|-------------|---------------------------------------------------------|-------------|
| Cytokine-cytokine receptor interaction (15) |             |                                                         |             |
| NM_002620.2                                 | PF4V1       | Platelet factor 4                                       | - 2.75      |
| NM_000878.2                                 | IL2RB       | Interleukin 2 receptor, beta                            | - 2.53      |
| NM_001337.3                                 | CX3CR1      | Chemokine (C-X3-C motif) receptor 1                     | - 2.43      |
| NM_002985.2                                 | CCL5        | Chemokine (C-C motif) ligand, other                     | - 2.17      |
| NM_001504.1                                 | CXCR3       | Chemokine (C-X-C motif) receptor 3                      | - 2.14      |
| NM_000634.2                                 | IL8RA       | Interleukin 8 receptor, alpha                           | 2.00        |
| NM_000565.2                                 | IL6R        | Interleukin 6 receptor                                  | 2.05        |
| NM_156038.2                                 | CSF3R       | Colony-stimulating factor 3 receptor (granulocyte)      | 2.09        |
| NM_022059.1                                 | CXCL16      | Chemokine (C-X-C motif) ligand 16                       | 2.13        |
| NM_014339.4                                 | IL17RA      | Interleukin 17 receptor                                 | 2.15        |
| NM_020530.3                                 | OSM         | Oncostatin M                                            | 2.80        |
| NM_004633.3                                 | IL1R2       | Interleukin 1 receptor, type II                         | 3.39        |
| NM_003853.2                                 | IL18RAP     | Interleukin 18 receptor accessory protein               | 3.58        |
| NM_173343.1                                 | IL1R2       | Interleukin 1 receptor, type II                         | 4.34        |
| NM_003855.2                                 | IL18R1      | Interleukin 18 receptor 1                               | 7.20        |
| MAPK signaling pathway (12)                 |             |                                                         |             |
| NM_031897.2                                 | CACNG6      | Calcium channel, voltage-dependent, Gamma subunit 6     | - 3.06      |
| NM_021872.2                                 | CDC25B      | Cell division cycle 25B                                 | - 2.06      |
| NM_006270.3                                 | RRAS        | Ras-related protein R-Ras                               | - 2.06      |
| NM_001042600.1                              | MAP4K1      | Mitogen-activated protein kinase kinase Kinase kinase 1 | - 2.04      |
| NM_004419.3                                 | DUSP5       | Dual specificity phosphatase                            | - 2.04      |

(Continued)

| GenBank ID                               | Gene symbol | Descriptive name                                        | Fold change |
|------------------------------------------|-------------|---------------------------------------------------------|-------------|
| NM_170604.2                              | RASGRP4     | Ras guanyl nucleotide-releasing protein                 | 2.03        |
| NM_003684.3                              | MKNK1       | MAP kinase interacting serine/threonine kinase          | 2.14        |
| NM_145686.2                              | MAP4K4      | Mitogen-activated protein kinase kinase kinase kinase 4 | 2.17        |
| NM_001315.1                              | MAPK14      | p38 MAP kinase                                          | 2.87        |
| XM_001128799.1                           | MAP3K2      | Mitogen-activated protein kinase kinase kinase 2        | 3.33        |
| NM_004633.3                              | IL1R2       | Interleukin 1 receptor, type II                         | 3.39        |
| NM_173343.1                              | IL1R2       | Interleukin 1 receptor, type II                         | 4.34        |
| Hematopoietic cell lineage (10)          |             |                                                         |             |
| NM_000073.1                              | CD3G        | CD3G antigen, gamma polypeptide                         | - 2.27      |
| NM_171827.2                              | CD8A        | CD8A antigen, alpha polypeptide                         | - 2.26      |
| NM_000419.3                              | ITGA2B      | Integrin alpha 2B                                       | - 2.24      |
| NM_001767.2                              | CD2         | CD2 antigen                                             | - 2.14      |
| NM_000565.2                              | IL6R        | Interleukin 6 receptor                                  | 2.05        |
| NM_156038.2                              | CSF3R       | Colony-stimulating factor 3 receptor (granulocyte)      | 2.09        |
| NM_000574.2                              | CD55        | Decay accelerating factor                               | 2.60        |
| NM_000902.3                              | MME         | Nepriylsin                                              | 3.01        |
| NM_004633.3                              | IL1R2       | Interleukin 1 receptor, type II                         | 3.39        |
| NM_173343.1                              | IL1R2       | Interleukin 1 receptor, type II                         | 4.34        |
| Leukocyte transendothelial migration (9) |             |                                                         |             |
| NM_002649.2                              | PIK3CG      | Phosphatidylinositol-4,5-bisphosphate 3-kinase          | 2.01        |
| NM_003370.3                              | VASP        | Vasodilator-stimulated phosphoprotein                   | 2.09        |
| NM_000433.2                              | NCF2        | Neutrophil cytosolic factor 2                           | 2.11        |
| NM_006496.1                              | GNAI3       | Guanine nucleotide binding protein (G protein), alpha   | 2.11        |
| NM_013416.2                              | NCF4        | Neutrophil cytosolic factor 4                           | 2.19        |
| NM_000631.3                              | NCF4        | Neutrophil cytosolic factor 4                           | 2.33        |
| NM_002859.1                              | PXN         | Paxillin                                                | 2.49        |
| NM_001315.1                              | MAPK14      | p38 MAP kinase                                          | 2.87        |

(Continued)

| GenBank ID                                    | Gene symbol | Descriptive name                                       | Fold change |
|-----------------------------------------------|-------------|--------------------------------------------------------|-------------|
| NM_004994.2                                   | MMP9        | Matrix metalloproteinase-9 (gelatinase B)              | 5.25        |
| Natural killer cell mediated cytotoxicity (9) |             |                                                        |             |
| NM_016382.2                                   | CD244       | CD244 natural killer cell receptor 2B4                 | - 3.24      |
| NM_147130.1                                   | NCR3        | Natural cytotoxicity triggering receptor 3             | - 2.51      |
| NM_002351.2                                   | SH2D1A      | SH2 domain protein 1A                                  | - 2.19      |
| NM_007360.1                                   | KLRK1       | Killer cell lectin-like receptor subfamily K, member 1 | - 2.19      |
| NM_005041.4                                   | PRF1        | Perforin 1 (pore forming protein)                      | - 2.17      |
| NM_001079.3                                   | ZAP70       | Zeta-chain (TCR) associated protein kinase             | - 2.13      |
| NM_000734.2                                   | CD247       | CD3Z antigen, zeta polypeptide                         | - 2.03      |
| NM_002649.2                                   | PIK3CG      | Phosphatidylinositol-4, 5-bisphosphate 3-kinase        | 2.01        |
| NM_002117.4                                   | HLA-C       | Major histocompatibility complex, class I              | 2.18        |

**Supplementary Table S4. The selected gene lists evaluated by hypergeometric distribution testing based on Gene Ontology (GO) annotations to determine their component within the cells**

**Supplementary Table S5. The ROC curve analysis of the plasma proteins encoded by the 10 candidate genes and STEMI standard marker, CK-MB and TnT**

| Variable | AUC   | 95% CI         | <i>P</i> value (vs CK-MB) | <i>P</i> value (vs TNT) |
|----------|-------|----------------|---------------------------|-------------------------|
| CKMB     | 0.587 | 0.465 to 0.702 | –                         | < 0.0001                |
| TNT      | 0.845 | 0.740 to 0.919 | < 0.0001                  | –                       |
| CA4      | 0.753 | 0.637 to 0.847 | 0.0113                    | 0.1991                  |
| CAMP     | 0.684 | 0.563 to 0.788 | 0.1584                    | 0.0314                  |
| IRAK3    | 0.966 | 0.894 to 0.994 | < 0.0001                  | 0.0023                  |
| MANSC1   | 0.81  | 0.700 to 0.893 | 0.0002                    | 0.5812                  |
| MMP9     | 0.827 | 0.720 to 0.906 | < 0.0001                  | 0.7666                  |
| MOSC1    | 0.737 | 0.620 to 0.834 | 0.0155                    | 0.108                   |
| QPCT     | 0.81  | 0.700 to 0.893 | < 0.0001                  | 0.5514                  |
| PGLYRP1  | 0.944 | 0.863 to 0.985 | < 0.0001                  | 0.0244                  |
| TREM     | 0.609 | 0.487 to 0.722 | 0.6824                    | 0.0002                  |
| VNN3     | 0.928 | 0.842 to 0.975 | < 0.0001                  | 0.0437                  |
